# Supplementary material for: 1,2-Migration in the reactions of ruthenium vinyl carbene with propargyl alcohols
Source: Royal Society of Chemistry journal article supplement (doi:10.1039/c4qo00152d), 2014-08-26
Supplement: c4qo00152d1.pdf [file c4qo00152d1.pdf]

## 1,2-Migration in the Reactions of Ruthenium Vinyl Carbene with Propargyl Alcohols

Xiaoxi Zhou,<sup>a</sup> Chunhong Zhang,<sup>a</sup> Yumei Lin,<sup>a</sup> Xumin He,<sup>a</sup> Yan Zhang,<sup>b</sup> Jianbo Wang,<sup>b, c</sup> and Haiping Xia<sup>\*a</sup>

<sup>a</sup> State Key Laboratory for Physical Chemistry of Solid Surfaces, Department of Chemistry, College of Chemistry and Chemical Engineering, Xiamen University, Xiamen, 361005, China. E-mail: hpxia@xmu.edu.cn;

Fax: 86-0592-2186628; Tel: 86-0592-2186658;

<sup>b</sup> Beijing National Laboratory of Molecular Sciences (BNLMS), Key Laboratory of Bioorganic Chemistry and Molecular Engineering of Ministry of Education, College of Chemistry, Peking University, Beijing, 100871, China;

<sup>c</sup> State Key Laboratory of Organometallic Chemistry, Chinese Academy of Sciences, Shanghai, 200032, China.

### Contents

1. Crystallographic details
2. NMR spectra

## 1. Crystallographic details

**Crystallographic Analysis:** All single crystals were mounted on glass fibers and transferred into a cold stream of nitrogen. Diffraction data for **2** were obtained on a Rigaku R-Axis SPIDER IP CCD area detector at 173(2) K, with graphite-monochromated Mo K $\alpha$  radiation ( $\lambda = 0.71073$  Å). Diffraction data for **3**, **5**, **6** were collected on an Oxford Gemini-S Ultra charge coupled device (CCD) diffractometer at 173(2) K, with monochromated Mo K $\alpha$  radiation ( $\lambda = 0.71073$  Å). Semi-empirical or multi-scan absorption corrections (SADABS) were applied.<sup>[1]</sup> Structures were solved by the Patterson function, completed by subsequent difference Fourier map calculations, and refined by full matrix least-squares on  $F^2$  using the SHELXTL program package.<sup>[2]</sup> Non-hydrogen atoms were refined anisotropically unless otherwise stated. Hydrogen atoms were placed at idealized positions and assumed the riding model. For all the complexes, crystals suitable for X-ray diffraction were grown from CH<sub>2</sub>Cl<sub>2</sub> solution layered with hexane.

[1] G. M. Sheldrick, *SADABS, Program for semi-empirical absorption correction*; University of Göttingen: Göttingen, Germany, 1997.

[2] G. M. Sheldrick, *SHELXTL*; Siemens Analytical X-ray Systems: Madison, Wisconsin, USA.

**Table 1** Crystal data and structure refinement for **2**, **3**, **5** and **6**.

| complex           | <b>2</b> ·3CH <sub>2</sub> Cl <sub>2</sub>                                              | <b>3</b> ·4CH <sub>2</sub> Cl <sub>2</sub>                                              | <b>5</b> ·1.5CH <sub>2</sub> Cl <sub>2</sub>                                            | <b>6</b> ·CH <sub>2</sub> Cl <sub>2</sub>                                                            |
|-------------------|-----------------------------------------------------------------------------------------|-----------------------------------------------------------------------------------------|-----------------------------------------------------------------------------------------|------------------------------------------------------------------------------------------------------|
| formula           | C <sub>59</sub> H <sub>48</sub> BCl <sub>2</sub> F <sub>4</sub> N<br>OP <sub>2</sub> Ru | C <sub>54</sub> H <sub>46</sub> BCl <sub>2</sub> F <sub>4</sub> N<br>OP <sub>2</sub> Ru | C <sub>48</sub> H <sub>42</sub> BCl <sub>2</sub> F <sub>4</sub> N<br>OP <sub>2</sub> Ru | C <sub>50</sub> H <sub>44</sub> BCl <sub>2</sub> F <sub>4</sub> NO<br><sub>2</sub> P <sub>2</sub> Ru |
| Mr                | 1362.48                                                                                 | 1385.34                                                                                 | 1096.93                                                                                 | 1080.51                                                                                              |
| crystal system    | Triclinic                                                                               | Triclinic                                                                               | Monoclinic                                                                              | Monoclinic                                                                                           |
| space group       | P-1                                                                                     | P-1                                                                                     | P2(1)/c                                                                                 | P2(1)/c                                                                                              |
| a, Å              | 12.818(3)                                                                               | 13.1474(8)                                                                              | 23.3968(8)                                                                              | 13.0587(4)                                                                                           |
| b, Å              | 14.788(7)                                                                               | 13.1912(7)                                                                              | 10.7057(4)                                                                              | 25.8151(7)                                                                                           |
| c, Å              | 16.847(7)                                                                               | 20.2329(12)                                                                             | 19.1358(7)                                                                              | 14.6635(4)                                                                                           |
| a, °              | 72.67(3)                                                                                | 80.722(5)                                                                               | 90                                                                                      | 90                                                                                                   |
| β, °              | 86.64(3)                                                                                | 87.504(5)                                                                               | 90.758(3)                                                                               | 95.876(3)                                                                                            |
| γ, °              | 84.12(3)                                                                                | 63.196(6)                                                                               | 90                                                                                      | 90                                                                                                   |
| V, Å <sup>3</sup> | 3031.1(11)                                                                              | 3089.3(3)                                                                               | 4792.7(3)                                                                               | 4917.3(2)                                                                                            |
| Z                 | 2                                                                                       | 2                                                                                       | 4                                                                                       | 4                                                                                                    |

|                                             |                 |                 |                |                |
|---------------------------------------------|-----------------|-----------------|----------------|----------------|
| dcalcd, g cm <sup>-3</sup>                  | 1.493           | 1.489           | 1.52           | 1.46           |
| F(000)                                      | 1384            | 1404            | 2228           | 2200           |
| crystal size, mm                            | 0.3×0.25×0.15   | 0.4×0.3×0.2     | 0.4×0.3×0.1    | 0.3×0.2×0.08   |
| θ range, °                                  | 3.04 - 25.00    | 2.72-25.00      | 2.78-25.00     | 2.75-25.00     |
| reflns collected                            | 23927           | 23097           | 21647          | 22197          |
| indep reflns                                | 10655           | 10874           | 8438           | 8656           |
| data/restraints/par<br>ams                  | 10655 / 0 / 721 | 10874 / 0 / 703 | 8438 / 0 / 582 | 8656 / 0 / 586 |
| GOF on F <sup>2</sup>                       | 0.974           | 1.138           | 1.355          | 1.001          |
| R <sub>1</sub> /wR <sub>2</sub> (I > 2σ(I)) | 0.0598/0.1792   | 0.0619/0.1691   | 0.0448/0.1173  | 0.0712/0.1618  |
| R <sub>1</sub> /wR <sub>2</sub> (all) data) | 0.0776/0.2180   | 0.0788/0.1808   | 0.0560/0.1221  | 0.0915/0.1736  |
| largest peak/hole<br>[e Å <sup>-3</sup> ]   | 2.352/-1.238    | 1.185/-1.296    | 1.047/-1.053   | 2.195/-1.960   |

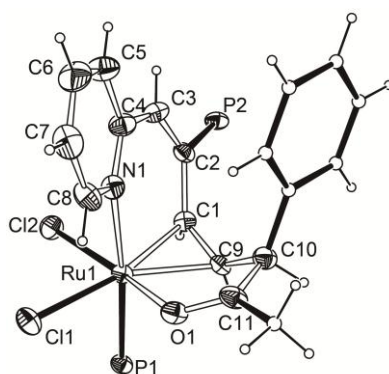

**Figure S1-1** Molecular structure for complex **3** (ellipsoids at the 50% probability level). The phenyl rings in PPh<sub>3</sub> groups and the counter anion are omitted for clarity. Selected bond distances [Å] and angles [°]: Ru(1)–O(1) 2.111(3), O(1)–C(11) 1.235(6), C(11)–C(10) 1.509(6), C(9)–C(10) 1.537(6), C(1)–C(9) 1.396(6), C(2)–C(1) 1.482(6), C(2)–C(3) 1.343(6), C(3)–C(4) 1.462(7), N(1)–C(4) 1.348(6), Ru(1)–C(1) 2.150(4), Ru(1)–C(9) 2.158(4), Ru(1)–N(1) 2.182(4), O(1)–Ru(1)–C(9) 74.67(14), O(1)–Ru(1)–C(1) 109.24(15), O(1)–C(11)–C(10) 119.0(4), C(11)–C(10)–C(9) 105.9(4), C(10)–C(9)–Ru(1) 110.5(3), C(9)–C(1)–C(2) 131.2(4), C(3)–C(2)–C(1) 128.9(4), C(2)–C(3)–C(4) 129.4(5), N(1)–C(4)–C(3) 120.9(4), O(1)–Ru(1)–N(1) 83.05(13), C(4)–N(1)–Ru(1) 127.4(3), C(1)–Ru(1)–C(9) 37.81(16).

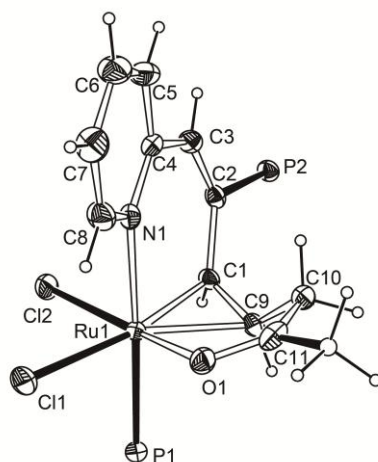

**Figure S1-2** Molecular structure for complex **5** (ellipsoids at the 50% probability level). The phenyl rings in PPh<sub>3</sub> groups and the counter anion are omitted for clarity. Selected bond distance [Å] and angles [°]: Ru(1)–O(1) 2.108(2), O(1)–C(11) 1.231(5), C(11)–C(10) 1.483(5), C(9)–C(10) 1.501(5), C(1)–C(9) 1.398(5), C(2)–C(1) 1.486(5), C(2)–C(3) 1.334(5), C(3)–C(4) 1.465(5), N(1)–C(4) 1.364(4), Ru(1)–C(1) 2.156(3), Ru(1)–C(9) 2.145(3), Ru(1)–N(1) 2.202(3), O(1)–Ru(1)–C(9) 74.63(11), O(1)–Ru(1)–C(1) 109.26(12), O(1)–C(11)–C(10) 118.1(3), C(11)–C(10)–C(9) 107.5(3), C(10)–C(9)–Ru(1) 107.5(2), C(9)–C(1)–C(2) 124.3(3), C(3)–C(2)–C(1) 129.2(3), C(2)–C(3)–C(4) 130.1(3), N(1)–C(4)–C(3) 121.1(3), O(1)–Ru(1)–N(1) 79.72(10), C(4)–N(1)–Ru(1) 128.0(2), C(9)–Ru(1)–C(1) 37.92(12).

## 2. NMR spectra

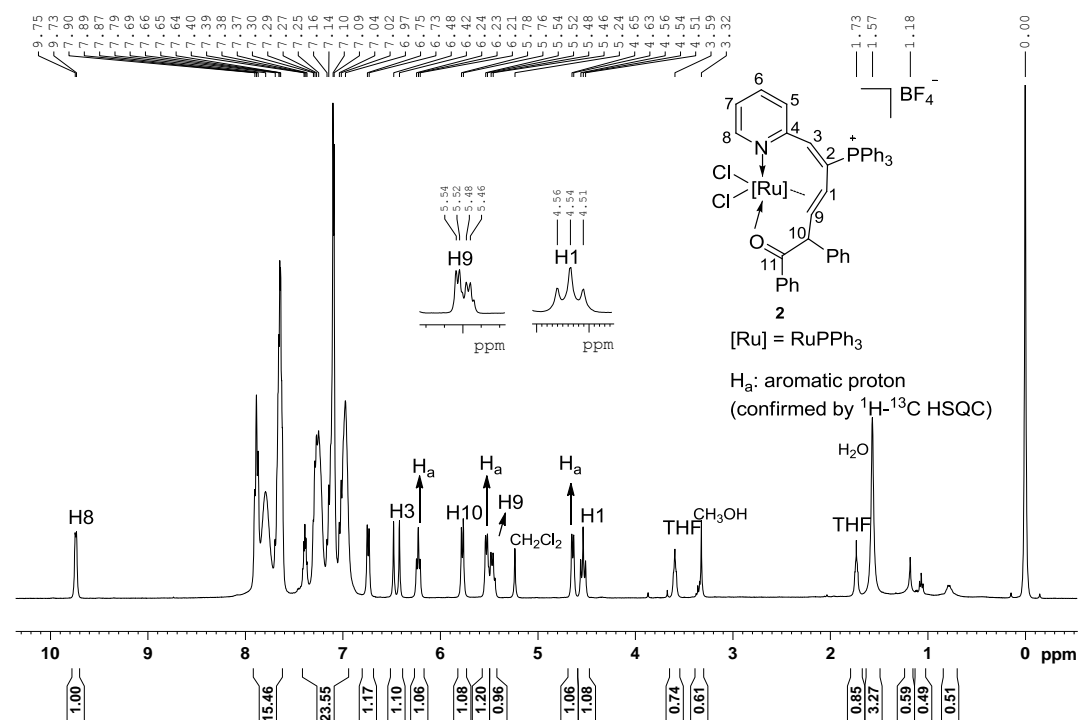

**Figure S2-1** The <sup>1</sup>H NMR spectrum of complex **2** in CD<sub>2</sub>Cl<sub>2</sub> at 400.13 MHz.

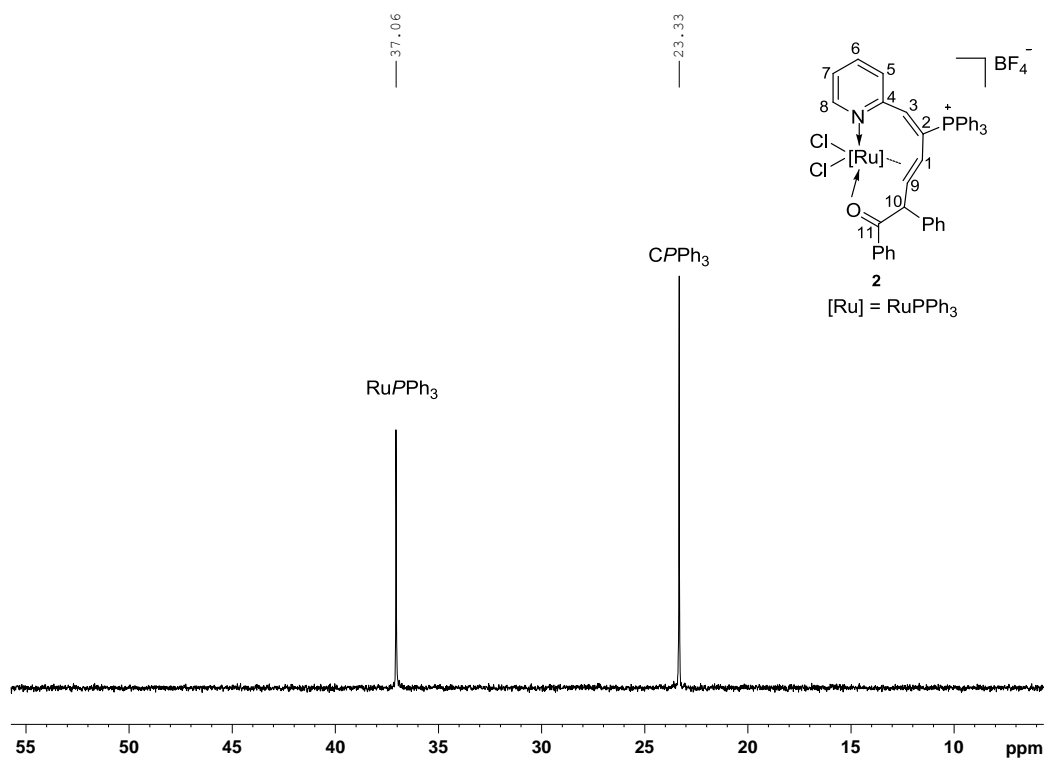

Figure S2-2 The <sup>31</sup>P NMR spectrum of complex **2** in CD<sub>2</sub>Cl<sub>2</sub> at 161.96 MHz

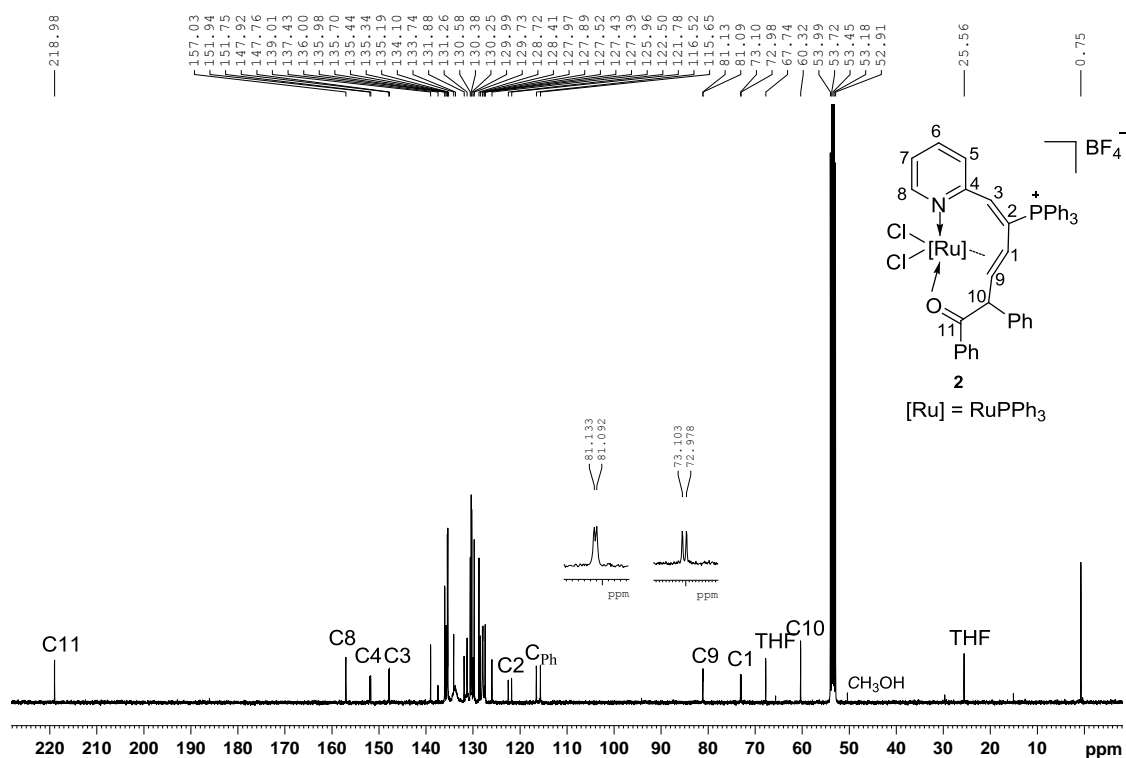

Figure S2-3 The <sup>13</sup>C NMR spectrum of complex **2** in CD<sub>2</sub>Cl<sub>2</sub> at 100.63 MHz.

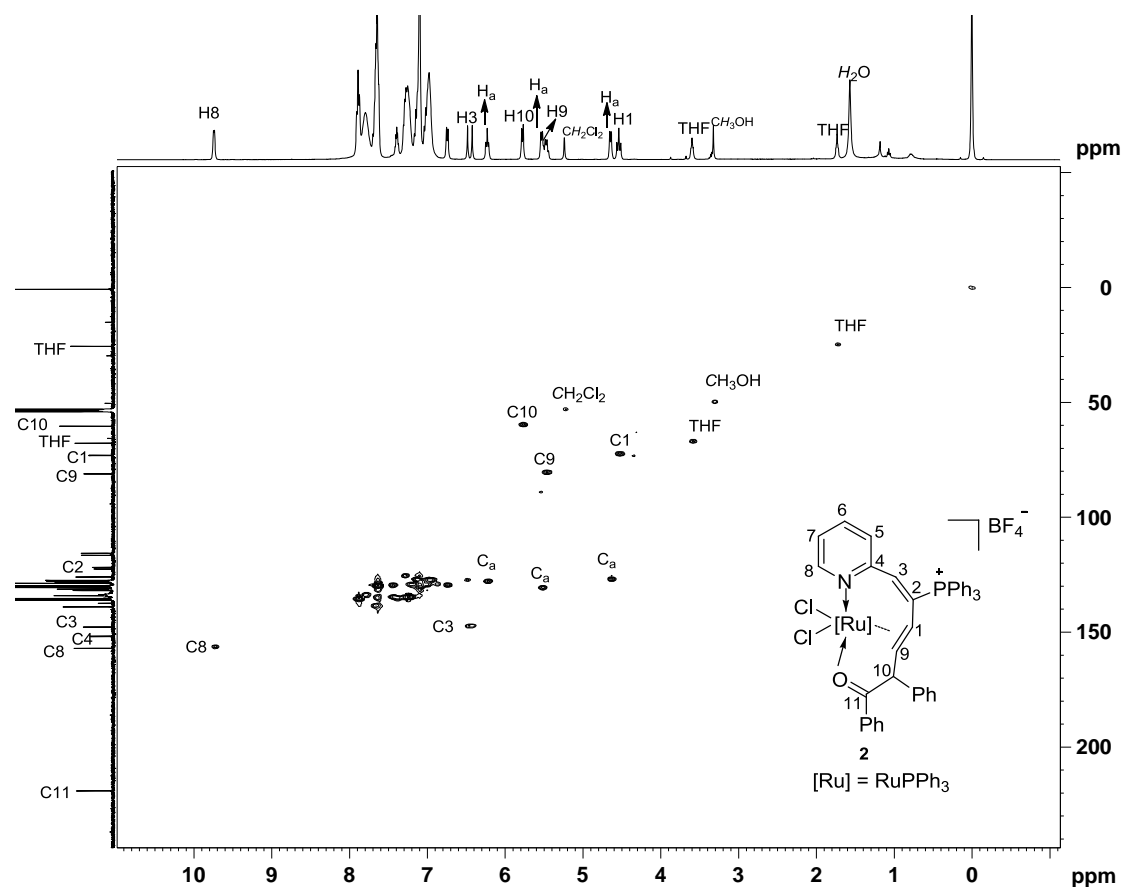

Figure S2-4 The  $^1\text{H}$ - $^{13}\text{C}$  HSQC of complex **2** in  $\text{CD}_2\text{Cl}_2$  at 100.63 MHz.

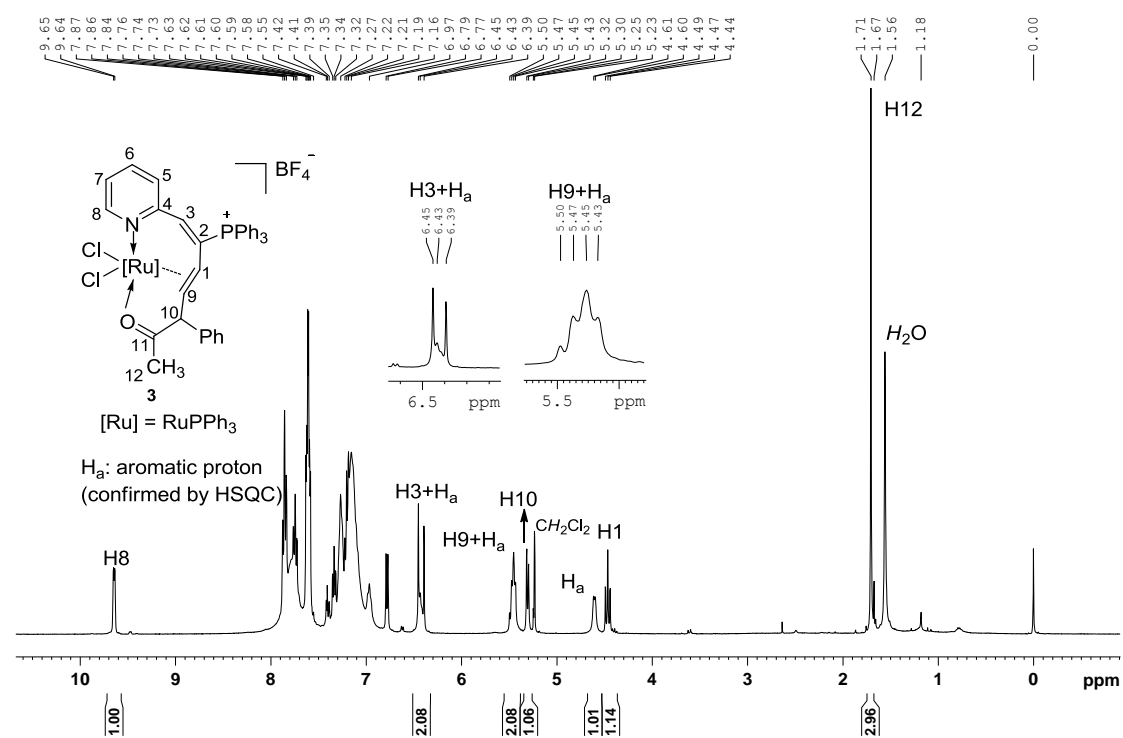

Figure S2-5 The  $^1\text{H}$  NMR spectrum of complex **3** in  $\text{CD}_2\text{Cl}_2$  at 400.13 MHz.

Additional peaks: 9.47, 6.62, 5.24, 4.40, 3.61, 1.67 ppm (a minor unidentified byproduct).



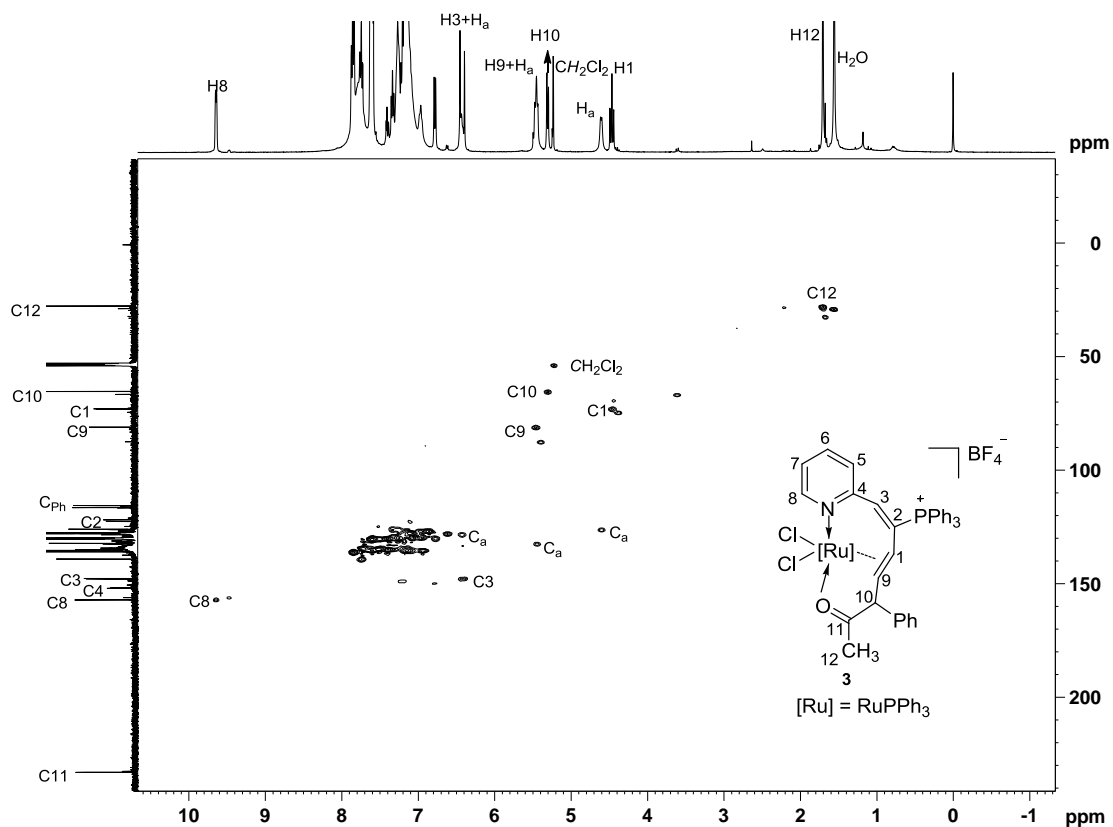

Figure S2-8 The  $^1\text{H}$ - $^{13}\text{C}$  HSQC spectrum of complex **3** in  $\text{CD}_2\text{Cl}_2$  at 100.63 MHz.

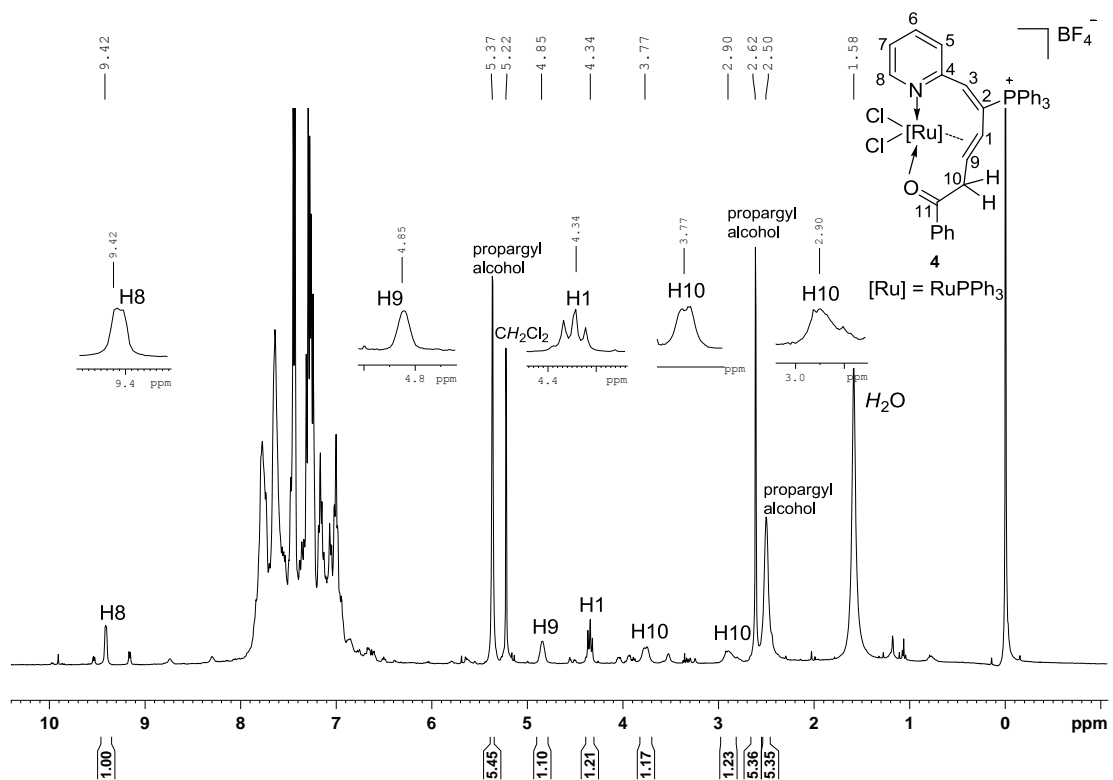

Figure S2-9 The in-situ  $^1\text{H}$  NMR spectrum of complex **4** in  $\text{CD}_2\text{Cl}_2$  at 400.13 MHz.

Additional peaks: peaks for other byproducts.



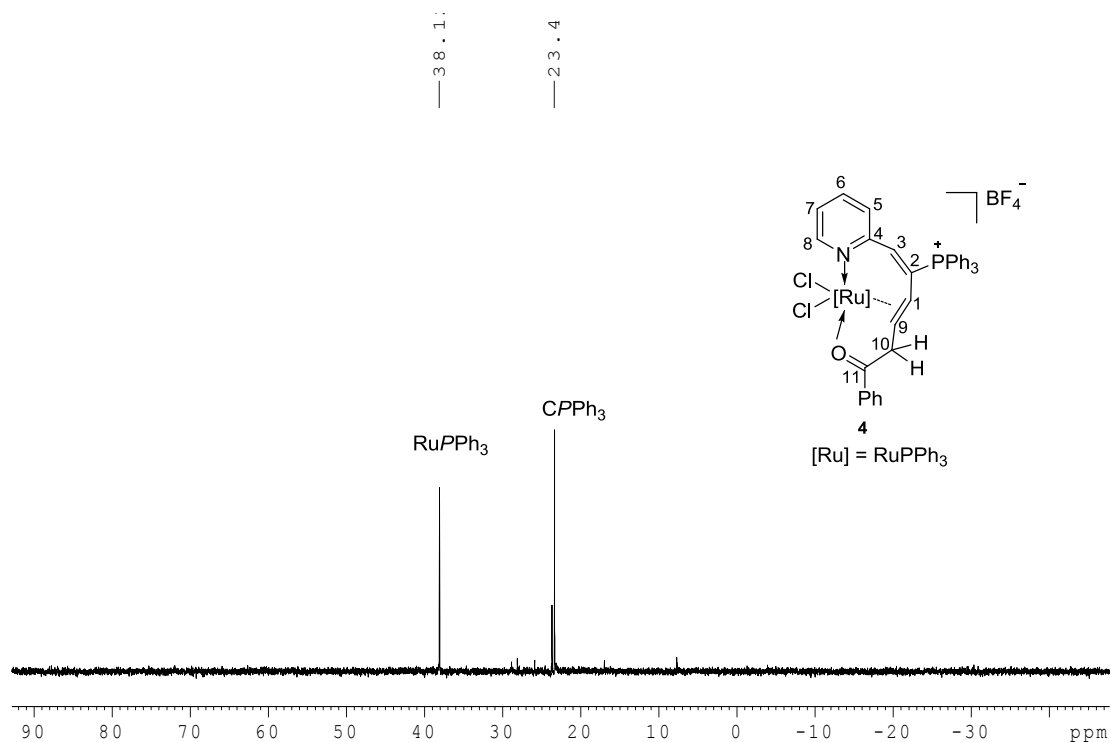

Figure S2-10 The in-situ <sup>31</sup>P NMR spectrum of complex **4** in CD<sub>2</sub>Cl<sub>2</sub> at 161.96 MHz.

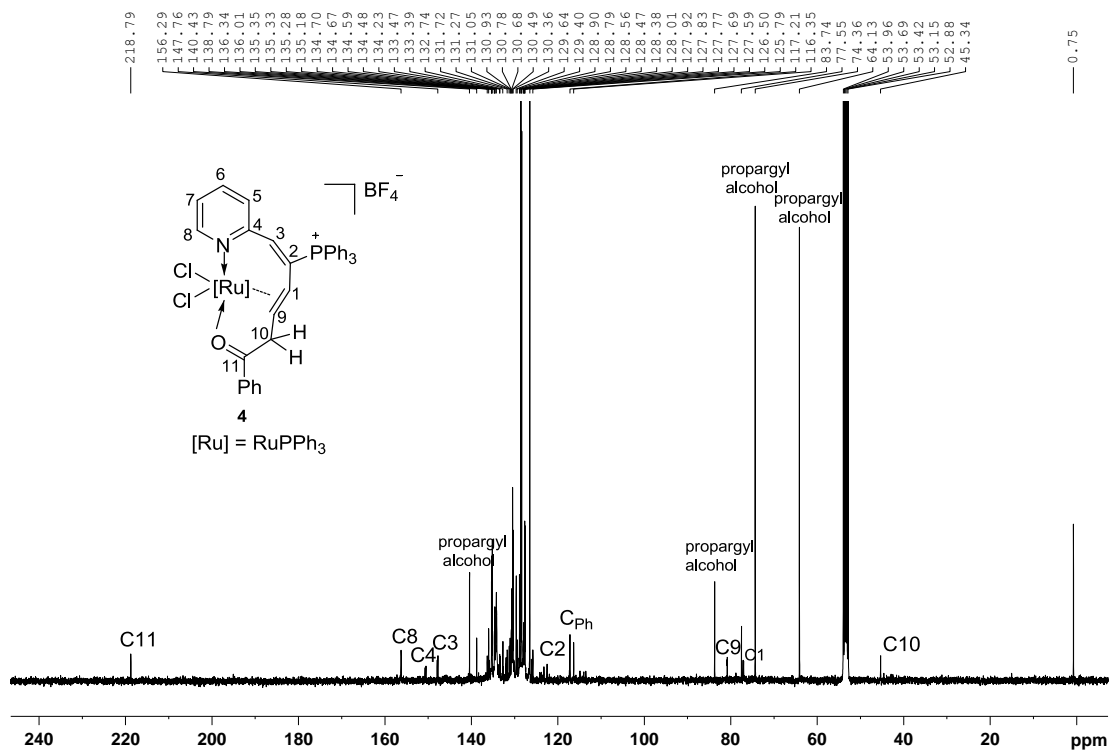

Figure S2-11 The in-situ <sup>13</sup>C NMR spectrum of complex **4** in CD<sub>2</sub>Cl<sub>2</sub> at 100.63 MHz.

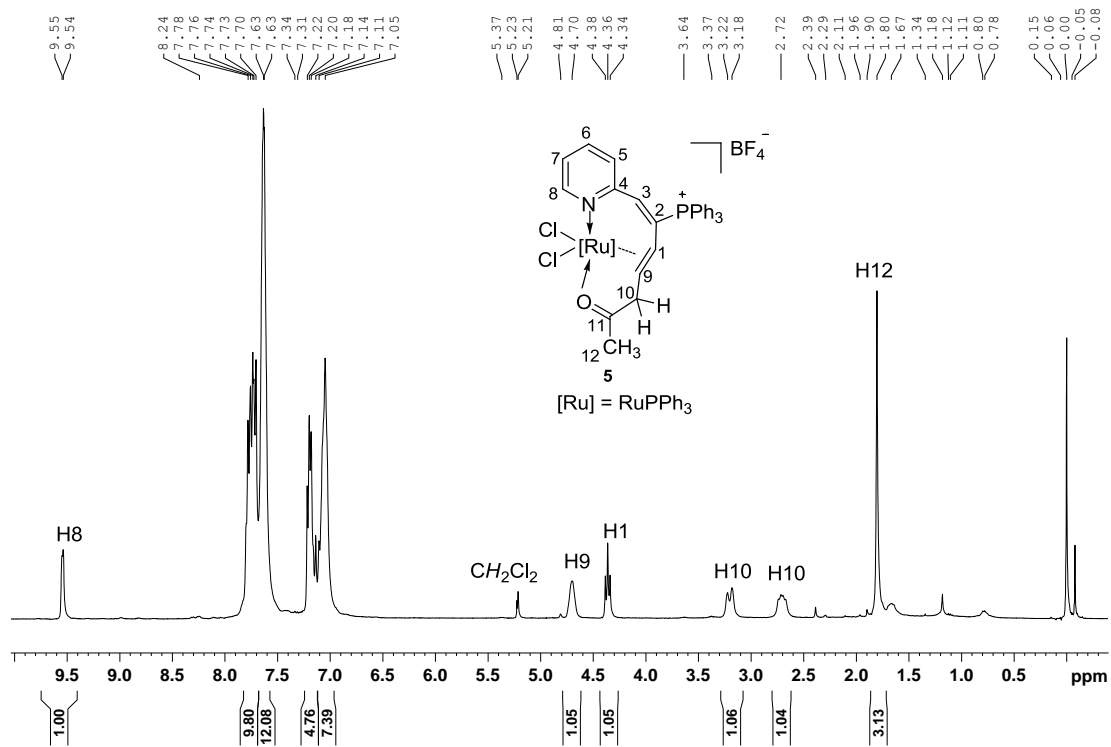

Figure S2-12 The  $^1\text{H}$  NMR spectrum of complex 5 in  $\text{CD}_2\text{Cl}_2:\text{CDCl}_3 = 3:5$  at 400.13 MHz.

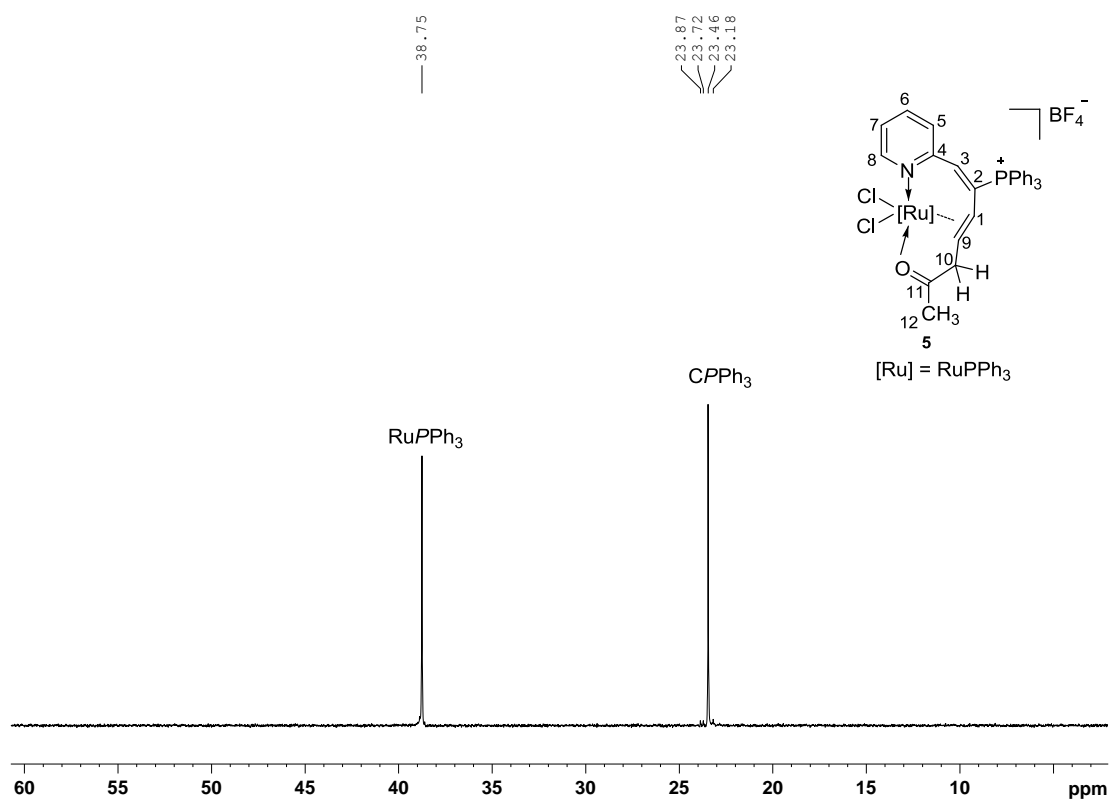

Figure S2-13 The  $^{31}\text{P}$  NMR spectrum of complex 5 in  $\text{CD}_2\text{Cl}_2:\text{CDCl}_3 = 3:5$  at 161.96 MHz.

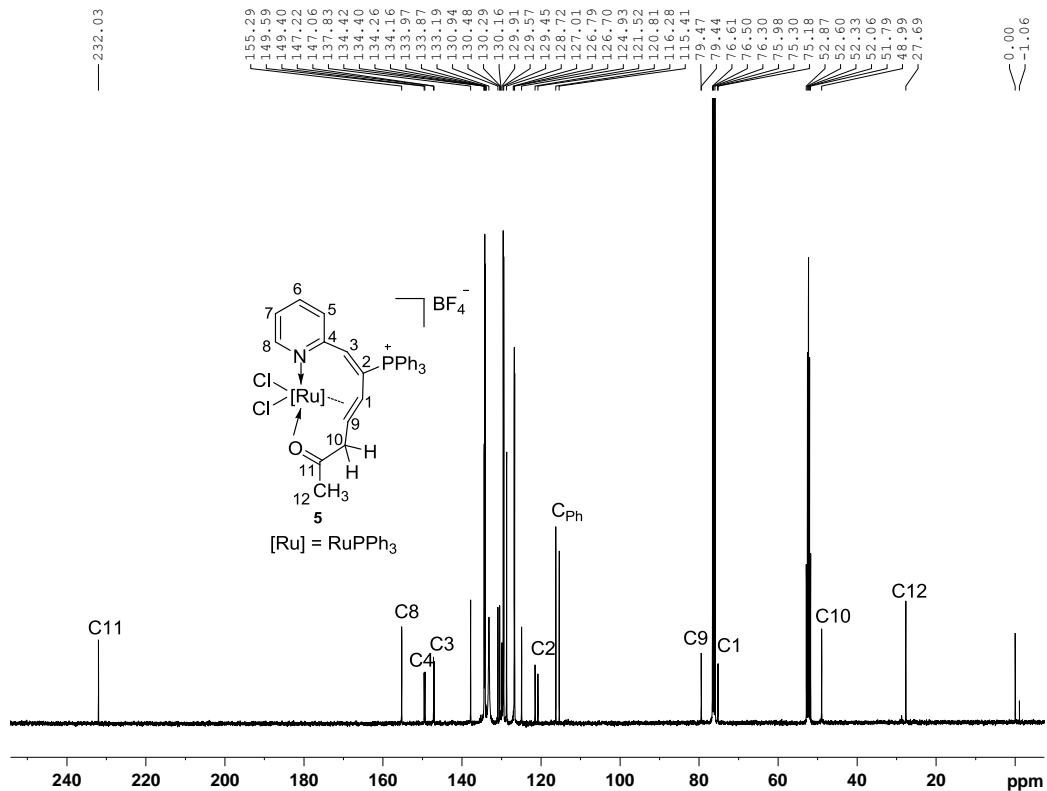

Figure S2-14 The  $^{13}\text{C}$  NMR spectrum of complex **5** in  $\text{CD}_2\text{Cl}_2:\text{CDCl}_3 = 3:5$  at 100.63 MHz.

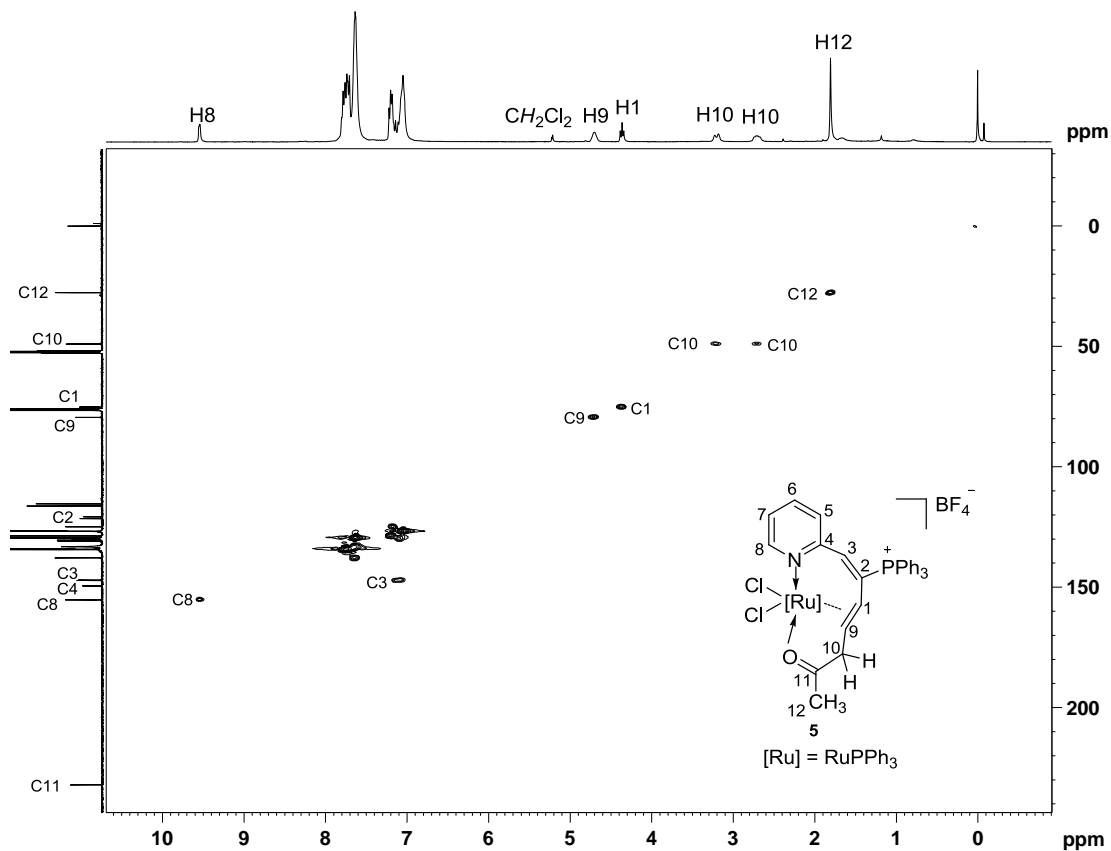

Figure S2-15 The  $^1\text{H}-^{13}\text{C}$  HSQC of complex **5** in  $\text{CD}_2\text{Cl}_2:\text{CDCl}_3 = 3:5$  at 100.63 MHz.

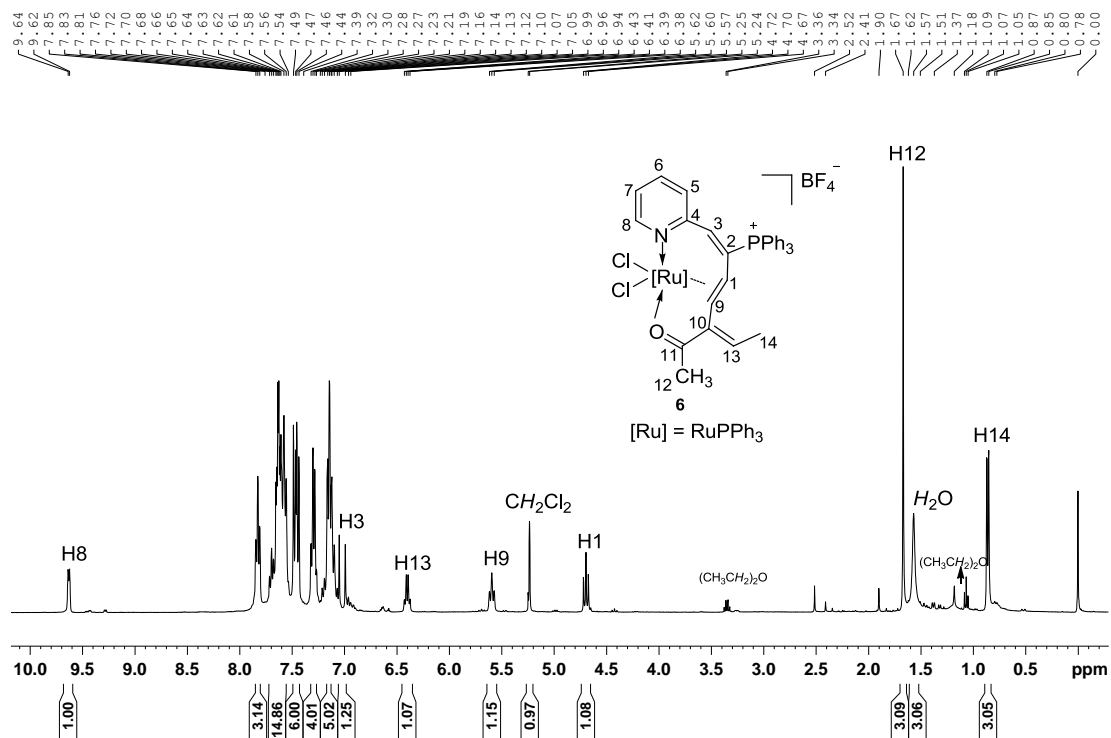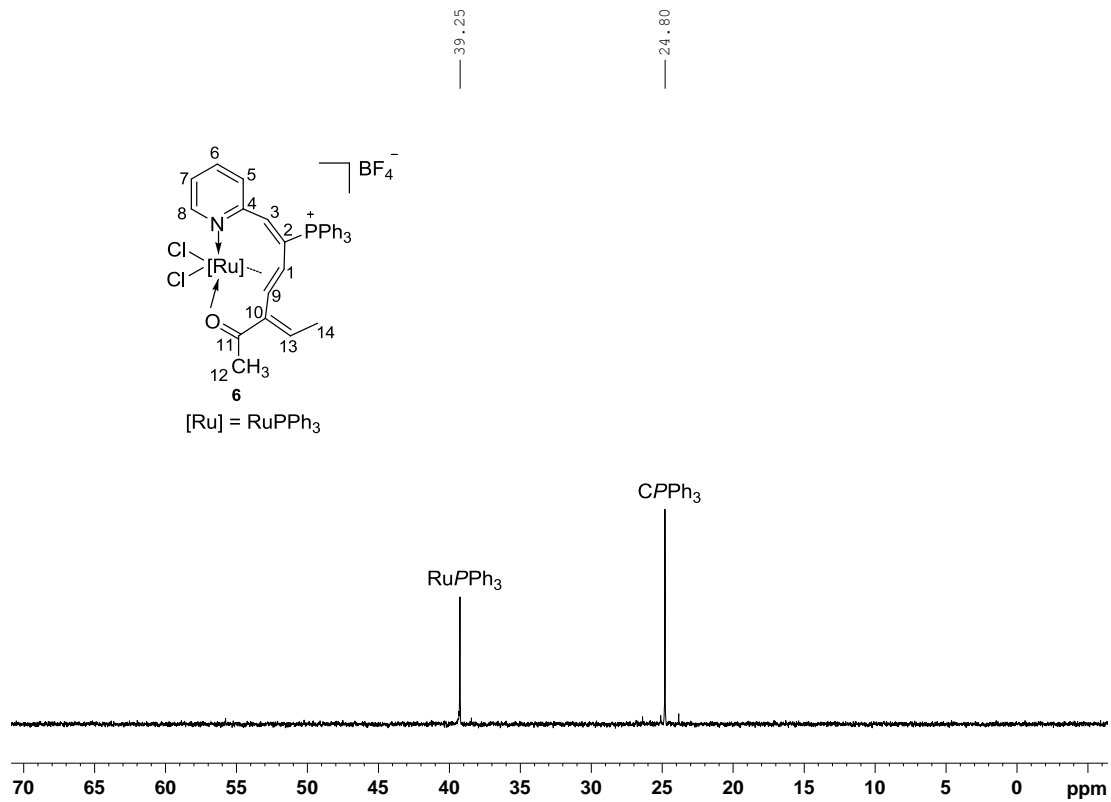

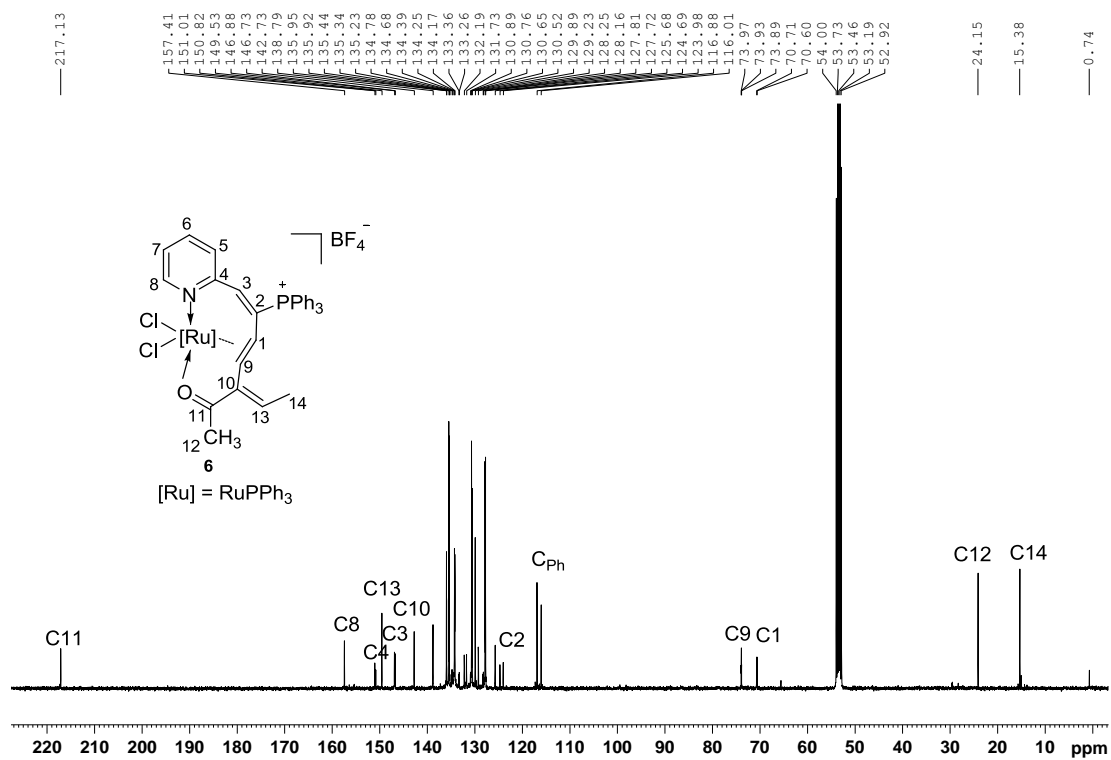

Figure S2-18 The  $^{13}\text{C}$  NMR spectrum of complex **6** in  $\text{CD}_2\text{Cl}_2$  at 100.63 MHz.

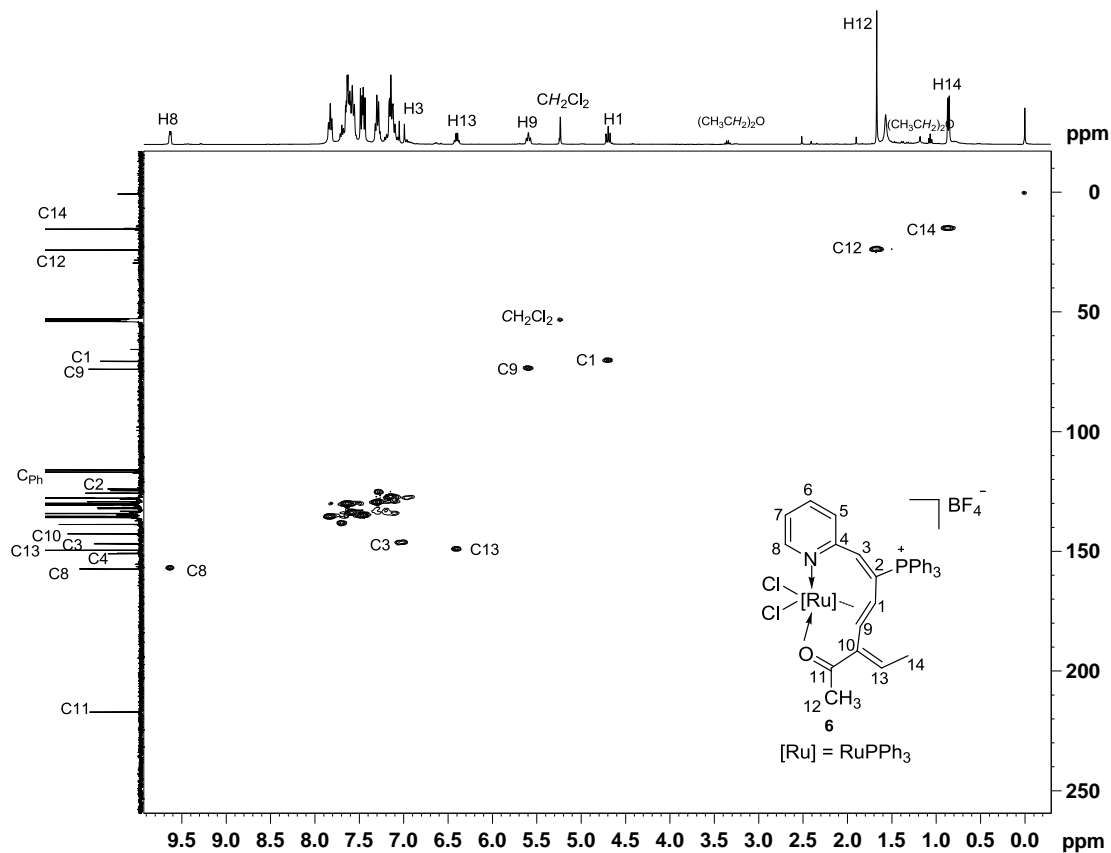

Figure S2-19 The  $^1\text{H}$ - $^{13}\text{C}$  HSQC spectrum for complex **6** in  $\text{CD}_2\text{Cl}_2$  at 100.63 MHz.
